# Supplementary material for: Microarray Analysis of Rat Pancreas Reveals Altered Expression of Alox15 and Regenerating Islet-Derived Genes in Response to Iron Deficiency and Overload
Source: PLoS One. 2014 Jan 21;9(1):e86019. doi: 10.1371/journal.pone.0086019 (PMC3897611; doi:10.1371/journal.pone.0086019)
Supplement: Table S2 — Functional categories of pancreatic genes differentially expressed in response to iron. (XLSX) [file pone.0086019.s002.xlsx]

## Sheet: Sheet1
Table S2. Functional categories of pancreatic genes differentially expressed in response to iron deficiency
Functional category	Gene symbol	Description	GenBank number	Fold changea
Lipid transport	Npc1l1	NPC1 (Niemann-Pick disease, type C1, gene)-like 1	NM_001002025	-2.269
	Mttp	microsomal triglyceride transfer protein	NM_001107727	-2.973
	Apoc3	apolipoprotein C-III	NM_012501	-3.185
	Apoa1	apolipoprotein A-I	NM_012738	-4.574
	Mogat2	monoacylglycerol O-acyltransferase 2	NM_001109436	-4.876
	Fabp2	fatty acid binding protein 2, intestinal	NM_013068	-5.962
	Fabp1	fatty acid binding protein 1, liver	NM_012556	-6.096
Antimicrobial	S100a9	S100 calcium binding protein A9	NM_053587	2.694
	Defa6	defensin alpha 6	NM_001033076	-2.709
	Defa-rs1	defensin alpha-related sequence 1	NM_001033073	-2.816
	Defa8	defensin alpha 8	NM_001033077	-3.111
Neuropeptide	Calca	calcitonin-related polypeptide alpha	NM_017338	-2.076
	Cartpt	CART prepropeptide	NM_017110	-2.484
	Gal	galanin prepropeptide	NM_033237	-3.08
	Vip	vasoactive intestinal peptide	NM_053991	-3.506
Pancreatitis-associated protein	Reg1a	regenerating islet-derived 1 alpha	NM_012641	2.236
	Reg3g	regenerating islet-derived 3 gamma	NM_173097	-2.476
	Reg4	regenerating islet-derived family, member 4	NM_001004096	-3.081
aFold change log2 relative to iron-adequate rat pancreas
